# Supplementary material
Source: PubMed Central journal article supplement (PMC7334583)
Supplement: pnas.2005832117.sapp.pdf [file pnas.2005832117.sapp.pdf]

# PNAS

www.pnas.org

Supplementary Information for

## Plastocyanin is the long-range electron carrier between photosystem II and photosystem I in plants

Ricarda Höhner<sup>1</sup>, Mathias Pribil<sup>2,3,#</sup>, Miroslava Herbstová<sup>4</sup>, Laura Susanna Lopez<sup>1</sup>, Hans-Henning Kunz<sup>5</sup>, Meng Li<sup>1</sup>, Magnus Wood<sup>1</sup>, Vaclav Svoboda<sup>1</sup>, Sujith Puthiyaveetil<sup>1,6</sup>, Dario Leister<sup>3,&</sup>, Helmut Kirchhoff<sup>1,\*</sup>

<sup>1</sup>, Institute of Biological Chemistry, Washington State University, PO Box 646340, Pullman, WA, 99164-6340, USA.

<sup>2</sup>, Copenhagen Plant Science Centre, Department of Plant and Environmental Sciences, University of Copenhagen, Thorvaldsensvej 40, DK-1871 Frederiksberg C, Copenhagen, Denmark.

<sup>3</sup>, Plant Molecular Biology (Botany), Department Biology I, Ludwig-Maximilians-Universität München, 81252 Planegg-Martinsried, Germany.

<sup>4</sup>, Institute of Plant Molecular Biology, Biology Centre CAS, Branišovská 1160/31, 37005 České Budějovice, Czech Republic.

<sup>5</sup>, School of Biological Sciences, Washington State University, PO Box 644236 Pullman, WA 99164-4236, USA.

<sup>6</sup>, Current address: Department of Biochemistry and Center for Plant Biology, Purdue University, West Lafayette, IN 47907.

Helmut Kirchhoff

Email: kirchhh@wsu.edu

### **This PDF file includes:**

Supplementary text  
Figures S1 to S5  
Tables S1 to S2  
SI References

SI Fig. 1

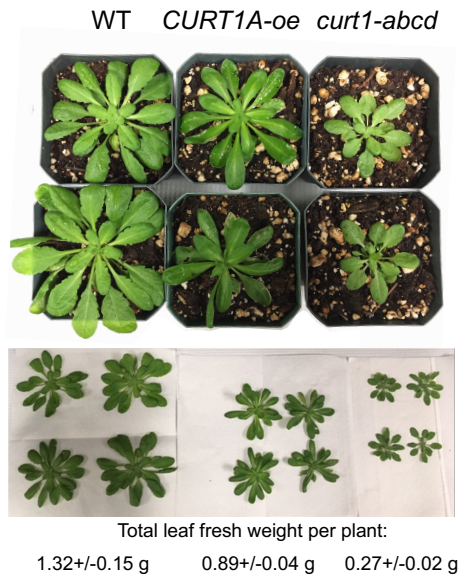

**SI Fig. 1.** Growth phenotype of WT and plants with altered CURT1 protein levels. Shown are 8-week-old plants. The weight numbers on the bottom represent the above ground biomass from four biological repeats.

## SI Fig. 2

Electron transport model for the high potential chain

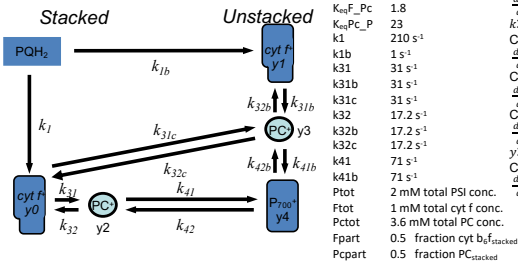

Redox midpoint potential and equilibrium constants ( $K_{eq}$ )

|                 | $\Delta E_m$ | Literature                 | Value used | $K_{eq}$          |
|-----------------|--------------|----------------------------|------------|-------------------|
| Rieske          | 310 mV       | Hope 1993                  | 310 mV     | Rieske-Cyt f: 6.0 |
|                 | 320 mV       | Hope 1993                  |            |                   |
| Cyt. f          | 280-320 mV   | Malkin 1981, Nitschke 1992 |            |                   |
|                 | 358 mV       | Hope 1993                  | 355 mV     | Cyt f - PC: 1.8   |
|                 | 355 mV       | Hope 1993                  |            |                   |
|                 | 350 mV       | Hope 1993                  |            |                   |
|                 | 350-370 mV   | Drepper 1994               |            |                   |
|                 | 340-360 mV   | Kirchhoff et al. 2004      |            |                   |
| PC              | 355-370 mV   | Kirchhoff et al. 2004      | (370 mV)   | (78.4)            |
|                 | 360-380 mV   | Drepper 1994               |            |                   |
| PC bound to PSI | 421 mV       | Kirchhoff et al. 2004      | (421 mV)   | (10.4)            |
| P700            | 465-485 mV   | Kirchhoff et al. 2004      | 480 mV     | 23*               |
|                 | 468-492 mV   | Drepper 1994               |            |                   |

\* Taken from the apparent PC/P700  $K_{eq}$  measured for WT.

Rate constants

|                                | $k_{forward}$                                                                                                                                                     | $k_{backward}$   | Literature                                                  | Value used                |
|--------------------------------|-------------------------------------------------------------------------------------------------------------------------------------------------------------------|------------------|-------------------------------------------------------------|---------------------------|
| PQH2 $\Rightarrow$ Rieske      | < 0.3 ms <sup>-1</sup><br>0.30 ms <sup>-1</sup><br>0.27 ms <sup>-1</sup>                                                                                          | No back reaction | Cramer et al. 1996<br>Hope 2003<br>Selak and Whimmarsh 1982 | k1 = 0.21                 |
| Rieske $\Leftrightarrow$ cyt f | fast                                                                                                                                                              | From $K_{eq}$    | Hope 1993                                                   | k21 = 1000                |
| Cyt f $\Leftrightarrow$ PC     | 1.7*10 <sup>7</sup> M <sup>-1</sup> s <sup>-1</sup><br>4.5*10 <sup>7</sup> M <sup>-1</sup> s <sup>-1</sup><br>9.2*10 <sup>7</sup> M <sup>-1</sup> s <sup>-1</sup> | From $K_{eq}$    | Sujak et al. 2004<br>Hope 2000                              | k31 = 3.1*10 <sup>7</sup> |
| PC $\Leftrightarrow$ P700      | 5.0*10 <sup>7</sup> M <sup>-1</sup> s <sup>-1</sup>                                                                                                               | From $K_{eq}$    | Hippler et al. 1998<br>Hope 1993                            | k31 = 7.1*10 <sup>7</sup> |

Differential equations

Concentration of reduced cyt f stacked ( $y_0$ ):  
 $\frac{dy_0}{dt} = k1 \cdot (F_{stack} - y_0) - k31 \cdot (PC_{stack} - y_2) \cdot y_0 + k32 \cdot (F_{stack} - y_0) \cdot y_2 - k31c \cdot (PC_{unstack} - y_3) \cdot y_0 + k32c \cdot (F_{stack} - y_0) \cdot y_3$

Concentration of reduced cyt f unstacked ( $y_1$ ):  
 $\frac{dy_1}{dt} = k1b \cdot (F_{unstack} - y_1) - k31b \cdot (PC_{unstack} - y_3) \cdot y_1 - k32b \cdot (F_{unstack} - y_1) \cdot y_3$

Concentration of reduced plastocyanin stacked ( $y_2$ ):  
 $\frac{dy_2}{dt} = k31 \cdot (PC_{stack} - y_2) \cdot y_0 + k32 \cdot (F_{stack} - y_0) \cdot y_2 - k41 \cdot (P700 - y_4) \cdot y_2 + k42 \cdot (PC_{stack} - y_2) \cdot y_4$

Concentration of reduced plastocyanin unstacked ( $y_3$ ):  
 $\frac{dy_3}{dt} = k31b \cdot (PC_{unstack} - y_3) \cdot y_1 + k32b \cdot (F_{unstack} - y_1) \cdot y_3 - k41b \cdot (P700 - y_4) \cdot y_3 + k42 \cdot (PC_{unstack} - y_3) \cdot y_4 + k31c \cdot (PC_{unstack} - y_3) \cdot y_0 - k32c \cdot (F_{stack} - y_0) \cdot y_3$

Concentration of reduced P700 ( $y_4$ ):  
 $\frac{dy_4}{dt} = k41 \cdot (P700 - y_4) \cdot y_2 - k42 \cdot (PC_{stack} - y_2) \cdot y_4 + k41b \cdot (P700 - y_4) \cdot y_3 - k42 \cdot (PC_{unstack} - y_3) \cdot y_4$

Simulated P700<sup>+</sup> and cyt f<sup>+</sup> re-reduction kinetics for diffusion restriction of PC or PQH<sub>2</sub> in *curt1abcd*

PC-diffusion restriction: deceleration of  $k31$ ,  $k31c$ ,  $k41$ ,  $k41c$  by factor 0.0024  
 PQ-diffusion restriction: deceleration of  $k1$  by factor 0.67  
 Deceleration factors determined to describe P700<sup>+</sup> kinetics.

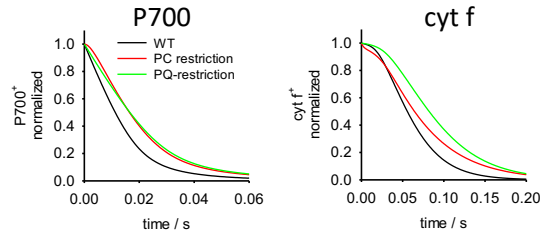

|                      | Half-times   |                  |                             |
|----------------------|--------------|------------------|-----------------------------|
|                      | WT           | <i>curt1abcd</i> | ratio <i>curt1abcd</i> / WT |
| P700 meas.           | 11.3+/-1.0ms | 16.6+/-2.3ms     | 1.47                        |
| P700 sim, WT         | 11.3ms       | -                | -                           |
| P700 sim, PC-restr.  | -            | 16.5ms           | 1.47                        |
| P700 sim, PQ restr.  | -            | 16.6ms           | 1.47                        |
| Cyt f meas.          | 57.2+/-7ms   | 66.6+/-8ms       | 1.16                        |
| Cyt f sim, WT        | 55.8ms       | -                | -                           |
| Cyt f sim, PC-restr. | -            | 64.4ms           | 1.15                        |
| Cyt f sim, PQ restr. | -            | 82.2ms           | 1.47                        |

**SI Fig. 2.** Mathematical model describing electron transport from PQH<sub>2</sub> to P700<sup>+</sup>. The differential equations on the upper right describe the re-reduction of the cyt f<sup>+</sup>, PC<sup>+</sup>, and P700<sup>+</sup> after a MT light pulse that reduces the PQ-pool mimicking the experiment in Fig. 4a (top). The model assumes two populations of cyt b<sub>6</sub>f complexes and PC localized to stacked and unstacked thylakoid regions, respectively (upper left). Rate constants and numbers used for the model are defined in the cartoon in the upper left. The tables to the lower left survey redox midpoint potentials and rate constants for these reactions. The outcome of the model for P700 and cyt f reduction kinetics for WT and *curt1abcd* is shown in the lower right for no restrictions in PQ- and PC-diffusion (black lines, WT), a PQ-diffusion restriction scenario (green lines) and for the case of PC-diffusion restriction (red lines). The half times for P700<sup>+</sup> and cyt f<sup>+</sup> derived from these kinetics are shown in the table at the bottom and are compared to measure data. Note that the apparent inhibition for cyt f<sup>+</sup> reduction is best described for the PC-diffusion restricted case (see numbers highlighted in red).

### SI Fig. 3

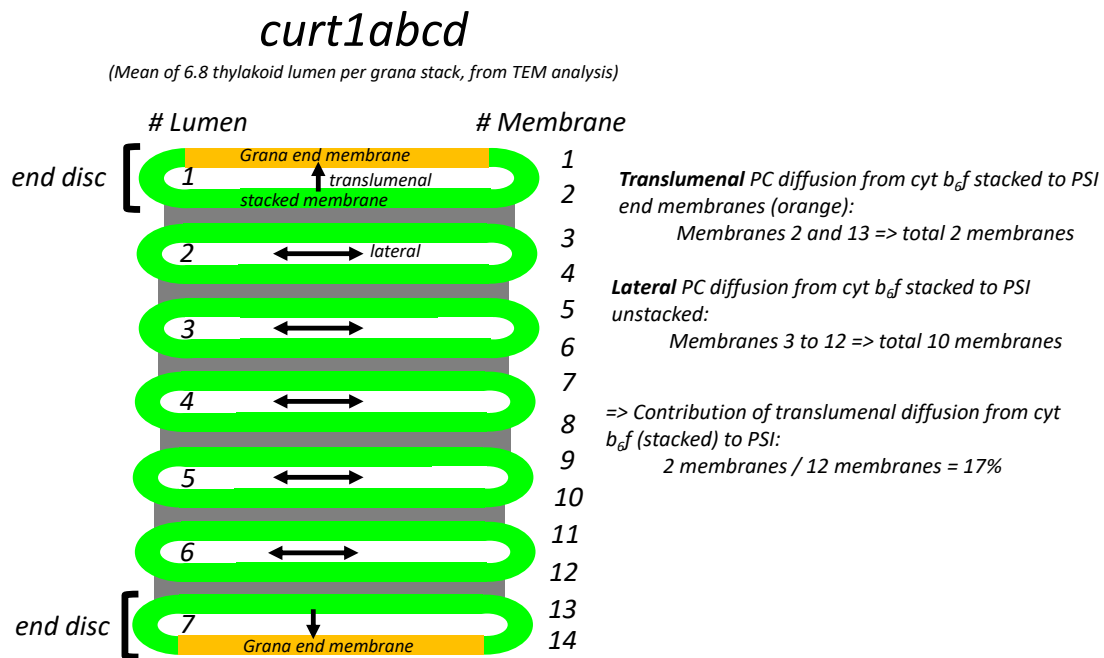

**SI Fig. 3.** Estimation of the contribution of transluminal PC-diffusion in grana end discs to connect cyt *b<sub>6</sub>f* complexes in stacked thylakoids to PSI for *curt1abcd*. The number of grana discs for *curt1abcd* were derived from TEM images. Transluminal PC-diffusion for end discs #1 and #7 is expected to be fast because of shorter diffusion distances (vertical instead of lateral) and lesser crowding of the lumen (PSII abundance low in end membranes). The model estimates the fraction of cyt *b<sub>6</sub>f* complexes localized in the stacked membranes #2 and #13 that are involved in transluminal PC diffusion relative to all cyt *b<sub>6</sub>f* complexes in stacked domains (connected to PSI by lateral and transluminal PC-diffusion). The assumption is that all stacked membranes (#s2-13) have the same cyt *b<sub>6</sub>f* concentration. The calculations to the right estimate that in stacked grana <20% of cyt *b<sub>6</sub>f* complexes are involved in fast transluminal diffusion in *curt1abcd*.

## SI Fig. 4

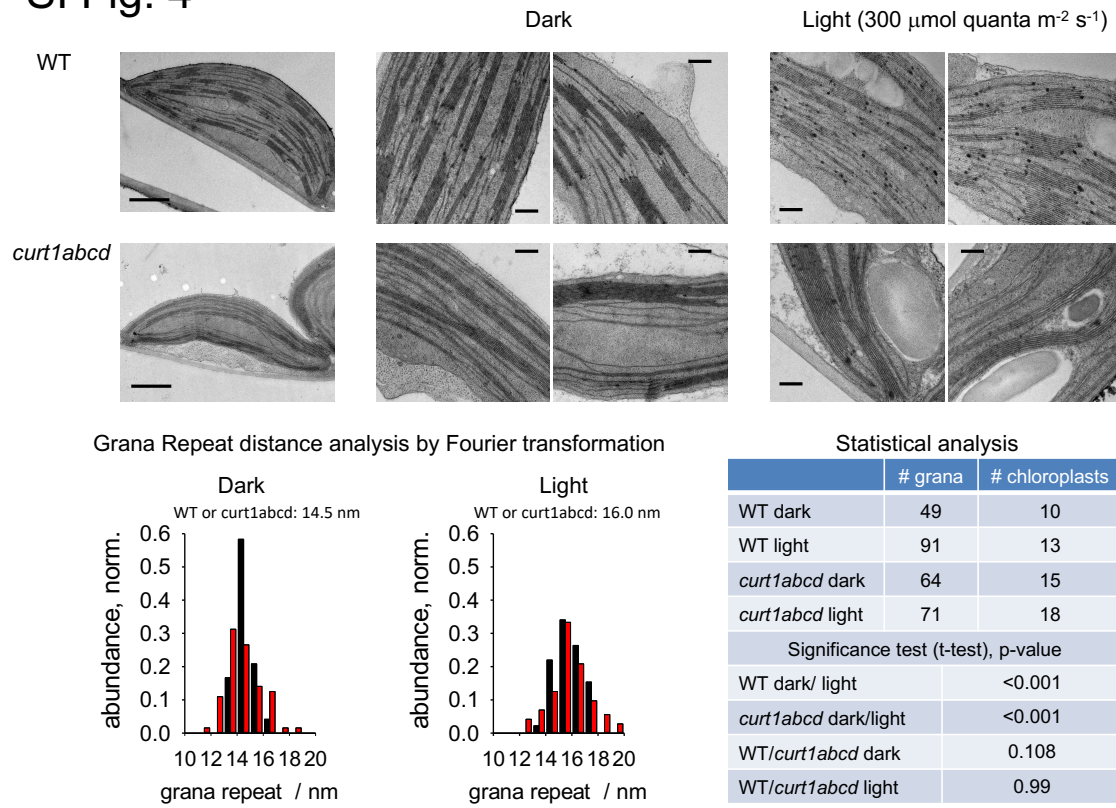

**SI Fig. 4.** Transmission electron microscopy (TEM) on leaf discs for WT (upper panel) and *curt1abcd* (lower panel). TEM examples for dark and light-adapted plants (20 min) are shown. The stacking repeat distances between two lumen in grana was determined by Fourier transformation as described in (Kirchhoff et al. 2011). Results and statistical analysis for dark- and light-adapted conditions are presented at the lower panel. Scale bars: Images to the left, 1000 nm, images middle and right, 200 nm. The analysis revealed that *curt1abcd* perform the same light-induced swelling of the thylakoid lumen as the WT. The absolute number of lumen swelling is smaller than reported in Kirchhoff et al. 2011 likely because of the lower light intensity used in this study (300 versus 500  $\mu\text{mol quanta m}^{-2} \text{s}^{-1}$ ).

## SI Fig. 5

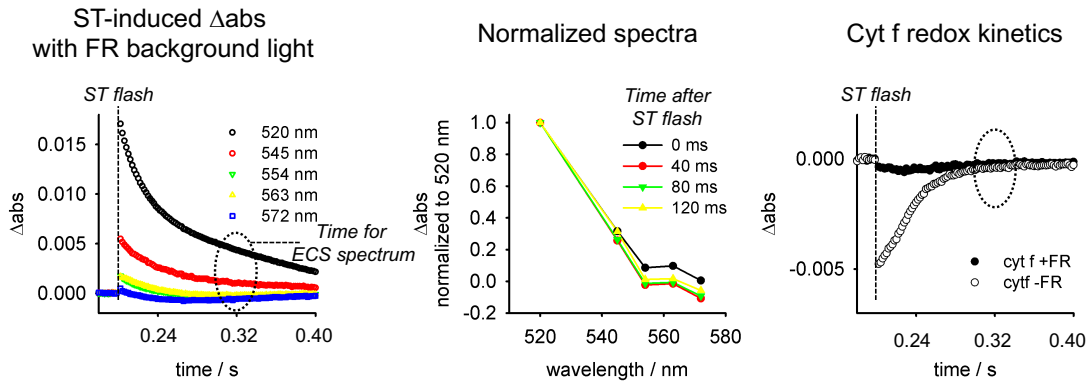

**SI Fig. 5.** Determination of the ECS contribution at 554 nm (cyt *f*) after baseline correction (545 nm to 572 nm). The graph to the left shows absorption changes induced by a ST flash in leaves illuminated with weak FR background light. The FR background light pre-oxidizes cyt *f*, i.e. the kinetics (left) are dominated by the ECS and not by cyt *f*. The indicated time interval (around 0.32 s) was used to extract the ECS specific absorption change (middle) since at this time interval the remaining cyt *f* redox change relaxed completely (black circles, right).

**Table S1: Survey of recent published ultrastructural data on the grana diameter for different higher plant species.**

| <b>Technique</b>       | <b>Grana diameter</b>      | <b>Reference</b>              | <b>Plant material</b>                         |
|------------------------|----------------------------|-------------------------------|-----------------------------------------------|
| Scanning –EM           | 500+/-28 nm                | Kaftan et al. 2005            | Lettuce                                       |
| AFM                    | 450+/-30 nm                | Kaftan et al. 2005            | Lettuce                                       |
| Thin-section EM        | 410+/-10 nm<br>470+/-10 nm | Armbruster et al.<br>2013     | Arabidopsis                                   |
| Thin-section EM        | 439+/-155 nm               | Fristedt et al. 2009          | Arabidopsis                                   |
| Thin-section EM<br>HPF | ca. 480 nm                 | Pfeiffer &<br>Krupinska 2005a | Barley                                        |
| Thin-section EM<br>HPF | 400-420 nm                 | Pfeiffer &<br>Krupinska 2005b | Stinging-nettle<br>( <i>Urtica dioica</i> L.) |
| EM tomography          | 350-550 nm                 | Daum et al. 2010              | Spinach                                       |
| EM tomography          | ca. 410 nm                 | Kouril et al. 2011            | Spinach                                       |
| 3D-SIM                 | 400-600 nm                 | Wood et al. 2019              | Spinach                                       |
| <b>Mean</b>            | <b>410-495 nm</b>          |                               |                                               |

**Table S2: Compositional characterization of intact thylakoid membranes and thylakoid subtractions.**

|                                                               | <b>WT</b>   | <b><i>curt1abcd-ko</i></b> | <b>CURT1A-oe</b> |
|---------------------------------------------------------------|-------------|----------------------------|------------------|
| <sup>a)</sup> mmol PSII / (mol Chl) thylakoid                 | 2.46+/-0.32 | 2.64+/-0.30                | 2.48+/-0.20      |
| <sup>a)</sup> mmol PSII / (mol Chl) stacked                   | 3.91+/-0.10 | 3.65+/-0.07                | 3.72+/-0.12      |
| <sup>a)</sup> mmol PSII / (mol Chl) unstacked                 | 1.99+/-0.15 | 2.61+/-0.08*               | 2.15+/-0.21      |
| <sup>b)</sup> mmol cyt b <sub>6</sub> f / (mol Chl) thylakoid | 0.90+/-0.12 | 0.80+/-0.10                | 0.84+/-0.07      |
| <sup>b)</sup> mmol cyt b <sub>6</sub> f / (mol Chl) stacked   | 0.59+/-0.06 | 0.47+/-0.03                | 0.54+/-0.05      |
| <sup>b)</sup> mmol cyt b <sub>6</sub> f / (mol Chl) unstacked | 1.37+/-0.16 | 2.00+/-0.13**              | 1.90+/-0.26      |
| <sup>c)</sup> mmol PC/ (mol PSI) thylakoid                    | 4.1+/-0.2   | 4.4+/-0.1                  | 4.2+/-0.1        |
| Chl a/b thylakoid                                             | 3.17+/-0.03 | 3.01+/-0.04**              | 3.17+/-0.06      |
| Chl a/b stacked                                               | 2.46+/-0.02 | 2.48+/-0.11                | 2.55+/-0.12      |
| Chl a/b unstacked                                             | 4.30+/-0.24 | 4.94+/-0.60                | 5.21+/-0.50      |

a) Determined by difference absorption spectroscopy of cyt b559.

b) Determined by difference absorption spectroscopy of cyt f and cyt b6.

c) Calculated from maximal difference absorption changes at 820 nm and (820nm-920nm) according to Kirchhoff et al. 2004.

Data represent the mean with SEM of 3 to 11 biological repetitions. \*, p-value < 0.05; \*\*, p-value < 0.01



## SI References

1. Kirchhoff, H., et al. Dynamic control of protein diffusion within the granal thylakoid lumen. *Proc Natl Acad Sci U S A* 108, 20248-20253(2011).
2. Armbruster U, Labs M, Pribil M, Viola S, Xu W, Scharfenberg M, Hertle AP, Rojahn U, Jensen PE, Rappaport F, Joliot P, Dörmann P, Wanner G, Leister D. (2013) Arabidopsis CURVATURE THYLAKOID1 proteins modify thylakoid architecture by inducing membrane curvature. *Plant Cell* 25, 2661-2678
3. Daum B, Nicastrò D, Austin II J, McIntosh R, Kühlbrandt W (2010) Arrangement of photosystem II and ATP synthase in chloroplast membranes of spinach and pea. *Plant Cell* 22: 1299-1312
4. Fristedt R, Willig A, Granath P, Crevecoeur M, Rochaix JD, Vener AV (2009) Phosphorylation of photosystem II controls functional macroscopic folding of photosynthetic membranes in Arabidopsis. *Plant Cell* 21, 3950–3964
5. Kaftan D, Brumfeld V, Nevo R, Scherz A, Reich Z (2002) From chloroplasts to photosystems: in situ scanning force microscopy on intact thylakoid membranes. *EMBO J.* 21, 6146-6153
6. Kouril R, Oostergetel GT, Boekema EJ (2011) Fine structure of granal thylakoid membrane organization using cryo electron tomography. *Biochim. Biophys. Acta* 1807, 368–374
7. Pfeiffer S, Krupinska K (2005a) New insights in thylakoid membrane organization. *Plant Cell Physiol.* 46, 1443–1451
8. Pfeiffer S, Krupinska K (2005b) Chloroplast ultrastructure in leaves of *Urtica dioica* L. analyzed after high-pressure freezing and freeze-substitution and compared with conventional fixation followed by room temperature dehydration. *Microscopy Research Technique* 68, 368–376
9. Wood WHJ, Barnett SFH, Flannery S, Huner CN, Johnson MP (2019) Dynamic thylakoid stacking is regulated by LHCII phosphorylation but not its interaction with PSI. *Plant Physiol.* 180, 2151-2166.
10. Kirchhoff H, Schoettler MA, Maurer J, Weis E. (2004) Plastocyanin redox kinetics in spinach chloroplasts: evidence for disequilibrium in the high potential chain. *Biochim.*

*Biophys. Acta* 1659, 63-72
